# 1 Novel sampling strategies and a coarse-grained score function 2 for docking homomers, flexible heteromers, and 3 oligosaccharides using Rosetta in CAPRI Rounds 37–45

4  
5 Shourya S. Roy Burman<sup>1,2,3</sup>, Morgan L. Nance<sup>4</sup>, Jeliuzko R. Jeliuzkov<sup>4,5</sup>, Jason W. Labonte<sup>1,6</sup>, Joseph  
6 H. Lubin<sup>1,7</sup>, Naireeta Biswas<sup>1,8</sup>, Jeffrey J. Gray<sup>1,4,9,10,\*</sup>

7  
8 <sup>1</sup> Department of Chemical and Biomolecular Engineering, Johns Hopkins University, Baltimore, Maryland, USA.

9 <sup>2</sup> *Current affiliation:* Department of Cancer Biology, Dana-Farber Cancer Institute, Boston, MA, USA.

10 <sup>3</sup> *Current affiliation:* Department of Biological Chemistry and Molecular Pharmacology, Harvard Medical School,  
11 Boston, MA, USA.

12 <sup>4</sup> Program in Molecular Biophysics, Johns Hopkins University, Baltimore, Maryland, USA.

13 <sup>5</sup> *Current affiliation:* Department of Biochemistry, University of Zurich, Zurich, Switzerland.

14 <sup>6</sup> *Current affiliation:* Department of Chemistry, Franklin & Marshall College, Lancaster, PA, USA.

15 <sup>7</sup> *Current affiliation:* Department of Chemistry and Chemical Biology, Rutgers, The State University of New Jersey,  
16 Piscataway, NJ, USA.

17 <sup>8</sup> *Current affiliation:* FS-SCS, Deutsches Elektronen-Synchrotron, Hamburg, Germany.

18 <sup>9</sup> Institute for NanoBioTechnology, Johns Hopkins University, Baltimore, Maryland, USA.

19 <sup>10</sup> Sidney Kimmel Comprehensive Cancer Center, Johns Hopkins School of Medicine, Baltimore, Maryland, USA.

20 Correspondence should be addressed to J.J.G. ([jgray@jhu.edu](mailto:jgray@jhu.edu))

21

## 22 Abstract

23

24 CAPRI Rounds 37 through 45 introduced larger complexes, new macromolecules, and multi-stage  
25 assemblies. For these rounds, we used and expanded docking methods in Rosetta to model 23  
26 target complexes. We successfully predicted 14 target complexes and recognized and refined  
27 near-native models generated by other groups for two further targets. Notably, for targets T110  
28 and T136, we achieved the closest prediction of any CAPRI participant. We created several  
29 innovative approaches during these rounds. Since Round 39 (target 122), we have used the new  
30 RosettaDock 4.0, which has a revamped coarse-grained energy function and the ability to  
31 perform conformer selection during docking with hundreds of pre-generated protein backbones.  
32 Ten of the complexes had some degree of symmetry in their interactions, so we tested Rosetta  
33 SymDock, realized its shortcomings, and developed the next-generation symmetric docking  
34 protocol, SymDock2, which includes docking of multiple backbones and induced-fit refinement.  
35 Since the last CAPRI assessment, we also developed methods for modeling and designing  
36 carbohydrates in Rosetta, and we used them to successfully model oligosaccharide–protein  
37 complexes in Round 41. While the results were broadly encouraging, they also highlighted the  
38 pressing need to invest in (1) flexible docking algorithms with the ability to model loop and linker  
39 motions and in (2) new sampling and scoring methods for oligosaccharide–protein interactions.

40

41

## 1 Introduction

2

3 With the explosion in genomic data availability and the ever-increasing accuracy of *in silico*  
4 protein folding methods, the ability to computationally model protein assemblies has taken  
5 center-stage. Protein-docking methods provide a rapid way to model assemblies, and hence,  
6 their progress has been a key focus of computational biophysics. Over the years, various  
7 approaches have been developed, each with a different scope and ability to integrate  
8 experimental data. Since 2001, a community-wide blind experiment, Critical Assessment of  
9 PRediction of Interactions (CAPRI), has been used to assess the state-of-the-art in computational  
10 macromolecular docking.<sup>1</sup> Participating groups predict the structure of a complex given the  
11 sequences of the constituent proteins, stoichiometry of association, and, in case of homomeric  
12 complexes, the point symmetry. Based on their resemblance to the unpublished, experimentally  
13 determined structure, the accuracy of the predictions is ranked. With every new round, the  
14 organizers add to the complexity of the modeling challenge by introducing more intricate  
15 complexes and non-protein macromolecules.

16

17 Our group has continuously evaluated our docking algorithm, RosettaDock<sup>2</sup> in CAPRI, leading to  
18 advances such as docking antibodies with loop flexibility,<sup>3</sup> varying protonation states while  
19 docking,<sup>4</sup> and interspersing conformational selection with docking.<sup>5</sup> Previous rounds of CAPRI  
20 necessitated the creation of protocols for flexible protein assembly and oligosaccharide–protein  
21 docking.<sup>6,7</sup> During this latest period with rounds 37 through 45, we developed RosettaDock 4.0  
22 to model flexible proteins<sup>8</sup> and refined GlycanDock to predict oligosaccharide–protein  
23 interactions.<sup>9</sup> Round 37 was a joint experiment between CAPRI and the Critical Assessment of  
24 Structure Prediction (CASP) in which preliminary monomer models submitted by CASP12  
25 participants were provided to the CAPRI participants for docking.<sup>10</sup> This round comprised nine  
26 symmetric homomers. Based on our performance on these homomers, we developed a new  
27 symmetric docking algorithm called Rosetta SymDock2.<sup>11</sup> Rounds 39 and 42 required global  
28 docking while predicting the conformation of long, flexible loops. These targets gave us an  
29 opportunity to add functionality to dock single-chain camelid antibodies in our antibody docking  
30 protocol, SnugDock.<sup>3</sup>

31

32 In this article, we examine the challenge of modeling with the available information, discuss the  
33 methodology we used, compare our CAPRI submissions to models made using new techniques,  
34 and suggest improvements to improve modeling accuracy.

35

## 1 Methods and Results

2

3 We predicted the structures of 23 complexes in CAPRI rounds 37 through 45. We achieved 1 high-  
4 quality, 6 medium-quality and 7 acceptable predictions. Table 1 summarizes successfully  
5 modeled targets and Table 2 summarizes our failed attempts.

6

7

### 8 Homomer docking successes

9

#### 10 Targets 110–112: Viral fiber head domains

11

12 The first three targets of round 37 were homo-trimeric fiber head domains from different viruses.  
13 Target 110 (T110) was the fiber head domain of raptor adenovirus 1, T111 was that of lizard  
14 adenovirus 2, and T112 was that of goose adenovirus 4, and the task was to predict the trimer  
15 quaternary structure.

16

17 Before we docked the models, the organizers provided us with the initial monomer models  
18 submitted by CASP12 participants. First, we relaxed all the models using Rosetta FastRelax,<sup>12</sup>  
19 clustered those with similar backbone conformations, and chose between one and four  
20 monomer backbones for docking. For T110, all homologous proteins had less than 40% sequence  
21 coverage and identity. Importantly, all these distant homologs lacked a beta-hairpin predicted by  
22 CASP monomer models (residues 358 to 373) present in T110. T111 had a homolog with 94%  
23 sequence coverage and 50% identity, which strongly suggested that the native structure would  
24 resemble snake adenovirus 1 fiber head (PDB ID: 4D0V)<sup>13</sup>. For T112, the avian adenovirus CELO  
25 fiber head (2IUM)<sup>14</sup> came the closest with 59% coverage and 27% identity. For T110, due to the  
26 aforementioned beta-hairpin, we performed symmetric global docking simulations with different  
27 monomer conformations, with and without the beta-hairpin, using Rosetta SymDock.<sup>15</sup> For initial  
28 subunit placement for T111 and T112, we used subunit arrangements derived from their  
29 respective homologs and refined the complexes using fixed-backbone refinement of SymDock.  
30 Between 10,000 and 50,000 models per monomer were generated for all three targets.

31

32 For T110, the crystal structure (PDB ID: 5FJL)<sup>16</sup> is shown in in Figure 1A (gray). The native structure  
33 did indeed possess a beta-hairpin as predicted, which is highlighted in red. On the superposed  
34 complex, the root-mean-square deviation of the C<sub>α</sub> atoms (RMSD<sub>Cα</sub>) of the predicted beta-hairpin  
35 was 1.4 Å from the native. Our best model (yellow) recovered 67% of the native contacts across  
36 the subunits and had a root-mean-square deviation of ligand backbone atoms (Lrmsd) of 2.35 Å  
37 and a root-mean-square deviation of interface backbone atoms (Irmsd) of 1.73 Å from the native,  
38 which were the lowest values among all of the models submitted by all of the groups. The  
39 presence of a close homolog made T111 an easy target with multiple groups, including us,  
40 predicting high-quality models. The crystal structure of the target is still unreleased, but we  
41 assume it to be similar to snake adenovirus 1 fiber head (4D0V). In Figure 1B, our best model is  
42 shown in orange superimposed on the gray crystal structure of the homolog. Conversely, the  
43 absence of close homologs made T112 difficult to model both in the monomeric state and in the

1 trimeric state. No group achieved a medium- or high-quality prediction. The Lrmsd and Irmsd of  
2 our best model was 5.8 Å and 2.9 Å, respectively and hence, it was classified as acceptable. The  
3 crystal structure of the target is still unreleased and no close homolog is available for a visual  
4 comparison.

5

6

7 Target 118: Fructose biphosphatase homo-octamer

8

9 T118 was a refinement challenge involving fructose 1,6-bisphosphatase from *Thermus*  
10 *thermophilus*. Although the organism is a hyperthermophile, we were not provided any  
11 temperature information about this target. A close homolog structure of fructose 1,6-  
12 bisphosphatase from a thermo-acidophilic archaeon, *Sulfolobus tokodaii* with 100% sequence  
13 coverage, 46% identity, and the same D4 symmetry (3R1M)<sup>17</sup> was available.

14

15 We extracted symmetry information from the aforementioned homolog, arranged the monomer  
16 models and refined the complex using fixed-backbone refinement of SymDock. Figure 1C shows  
17 our best model in color and the crystal structure of the homolog in gray. The crystal structure of  
18 the target is yet to be released. The model recovered 41% of the native contacts with Lrmsd and  
19 Irmsd values of 1.7 Å and 1.0 Å, respectively, and hence, was classified as a medium-quality  
20 model.

21

22

23 Target 119: Archaeal halo-thermophilic alcohol dehydrogenase

24

25 T119 challenged us with atypical modeling conditions. The homo-dimeric protein, alcohol  
26 dehydrogenase, was from a halo-thermophilic archaeon expressed in a halo-mesophilic  
27 expression system. The behavior of this enzyme is pH dependent: in the pH range of 9.6–10.2, its  
28 oxidative reaction peaks, whereas at pH of 6.4, reduction reaction is dominant.<sup>18</sup> We were asked  
29 to predict the structure of the complex at pH 10.

30

31 First, we relaxed and selected monomer models from CASP12 participants. The closest  
32 homologous homo-dimer that we found was alcohol dehydrogenase 2 from the bacteria  
33 *Zymomonas mobilis* (3OWO)<sup>19</sup>. The two subunits of the homolog had extensive cross-beta sheet  
34 interactions along the N-termini. The N-termini interaction served as a hinge, where a small error  
35 in the backbone would result in a drastically different rigid-body conformation. Unfortunately,  
36 this region of the target protein was predicted to be disordered and was different in all monomer  
37 models. As a result, we had to partly truncate the N-terminus. We followed a two-pronged  
38 approach to model this target: on the one hand, we explored the homo-dimeric conformational  
39 space using the standard SymDock protocol; on the other hand, we sampled different residue  
40 protonation states at pH 10 with a variant of RosettaDock called with Rosetta pHDock<sup>4</sup>. We  
41 produced 10,000 docking models with each method and chose the most symmetric proteins  
42 interacting at the N-terminus for pHDock.

43

1 Figure 1D shows our best model in yellow, the crystal structure in gray, and the N-terminus of  
2 the crystal structure in red. Despite missing key interactions at the N-terminus, we were able to  
3 predict the rough placement of the subunits correctly, and hence our best model was adjudged  
4 acceptable. The model predicted 61% of the native contacts with Lrmsd and Irmsd values of 9.9  
5 Å and 3.0 Å, respectively. This large difference of RMSD values arises from the aforementioned  
6 hinge motion, where a small change in the N-terminus backbone leads to large changes globally.  
7 The best model across all groups was a medium-quality model.

8  
9

#### 10 Target 136: Lysine decarboxylase homo-decamer

11

12 T136 was the homo-decameric lysine decarboxylase, LdcA from *Pseudomonas aeruginosa*. Close  
13 homologs were available for the complex in the form of lysine decarboxylase, LdcI from *E. coli*  
14 (5FKZ) and arginine decarboxylase, AdiA (2VYC) from *Salmonella typhimurium*. The wing domain  
15 of the subunits was given to be significantly different to the homologs leading to different inter-  
16 subunit contacts. As the subunit arrangement was likely to be similar to its homologs, the  
17 challenge of this complex was to model the wing domain correctly within the confines of the D5  
18 symmetry. Another issue was the sheer size of the protein: ten subunits each with 750 residues  
19 making extensive interfaces with other subunits makes it the largest CAPRI target to date,  
20 requiring high-memory workstations for docking.

21

22 We started by modeling the monomer using the online server, Robetta,<sup>20</sup> which produced  
23 convergent conformations for the wing domain that were distinct from the homologs. Drawing  
24 on symmetry information from the homologs and arranging the subunits accordingly led to steric  
25 clashes at the wing domain. All fixed-backbone refinement efforts using SymDock failed to  
26 produce a plausible structure free of clashes. Instead, SymDock refinement resulted in an  
27 unrealistic inter-subunit distance by expanding the complex to relieve the clashes. We  
28 conjectured that the monomers needed to be relaxed in the context of the complex, and not  
29 independent of it. We achieved this by superimposing ten copies of each monomer model onto  
30 each of the subunits of the homolog, AdiA and then relaxing one of the monomers with the other  
31 nine copies present. On doing so and then docking the context-refined monomers, we were able  
32 to obtain structures where the wing domain readily fits into the given symmetry without steric  
33 clashes. Figure 1E shows our model for LdcA with the wing domains of five subunits highlighted  
34 in darker hues against lighter tints of the rest of the subunit. We predict that each wing domain  
35 contacts two neighboring wing domains and well as a neighboring chain. Our scoring model  
36 (based on our prediction model) was adjudged to be the highest quality for any group (medium  
37 quality overall) and recovered 60% of the native contacts with Lrmsd and Irmsd of 2.4 Å and 1.7  
38 Å, respectively.

39

40

41

1 Post-hoc analysis of the performance of SymDock2 on CAPRI targets

2

3 We noticed a pattern of error whereby when starting from the symmetric arrangement of a  
4 homolog, Rosetta SymDock protocol would expand the overall size of the complex to relieve  
5 inter-chain clashes. This phenomenon progressively worsened for higher order symmetries.  
6 Given the same set of inputs, we tested (post-CAPRI) whether SymDock2<sup>11</sup> improved the quality  
7 of the models for three of the complexes where this error was observed, *viz.* T110, T118, and  
8 T136.

9

10 For T110, the best model amongst the 10 top-scoring models had the same overall classification  
11 as our original submission, medium-quality. However, its inter-subunit distance of 23.7 Å was 2%  
12 smaller than the native (5FJL) structure's distance of 24.2 Å. This reversed the trend of the best  
13 structure from SymDock, which had a 4% larger inter-subunit distance of 25.0 Å. The cause of  
14 this compression is not because the individual monomers are closer to the native; in fact, the  
15 RMSD<sub>ca</sub> of the monomers in SymDock was 1.1 Å compared to 1.2 Å after SymDock2. The tighter  
16 fit was achieved by subtle backbone changes during SymDock2's flexible backbone refinement.

17

18 We observed a big improvement for T118, where most of SymDock2's 10 top-scoring models  
19 were high-quality (using monomer model superposition to a close homolog, 3R1M, to  
20 approximate native). The best structure from SymDock2 recovered 73% of the "native" contacts  
21 while having a sub-angstrom Lrmsd. Had we submitted this structure during CAPRI, it would have  
22 been the best structure across all groups. Moreover, the inter-subunit distance of the SymDock2  
23 model was 40.3 Å compared to 43.3 Å in the SymDock model and 39.0 Å in the homolog. Thus,  
24 the SymDock2 model expands by just 3% relative to the homolog and presumably recovers  
25 additional inter-chain contacts compared to the SymDock model, which expands by 11%.  
26 Supplementary Figure S1A highlights the similarity of the SymDock2 model to the "native" and  
27 Figure S1B compares the SymDock and SymDock2 models and the distance between monomers.

28

29 As we could not generate a feasible structure for T136 using SymDock, a direct comparison is not  
30 possible. Instead, first, we had relaxed the monomer in context of its partners and then used that  
31 monomer with SymDock. The inter-subunit distance for the best-scoring model was 62.2 Å, a 1%  
32 increase over the distance of 61.6 Å in a close homolog (2VYC). With SymDock2, we could  
33 generate models starting from the initial homology-modeled monomers with the best-scoring  
34 model having an inter-subunit distance of 63.1 Å, which was 2% more than the homolog. Thus,  
35 with better packing of interfaces due to flexible backbone refinement, SymDock2 resolves the  
36 problem of complex expansion in SymDock and thus, significantly outperforms SymDock on  
37 CAPRI targets.

38

39

40



## 1 Homomer docking failures

2

### 3 Target 114: Ljungan virus protein

4

5 T114 was the homodimeric-protein 2A2 from Ljungan virus. The function of this protein is  
6 unknown. We were provided with monomer models from CASP12 participants. We relaxed the  
7 models and chose five top-scoring, distinct models for docking. We found no homologs from  
8 which to extract symmetry information, and hence, we performed a global search of C2  
9 configuration space to generate 50,000 models for each monomer structure. None of the models  
10 submitted by us or any predictor was adjudged to be correct. As the experimental structure of  
11 this protein has not been released yet, we could not determine the reason(s) for failure.

12

13

### 14 Target 116: Bifunctional histidine kinase

15

16 T116 was two domains (Dhp and CA) of the homo-dimer, CckA of *Caulobacter crescentus*. We  
17 identified several homo-dimeric histidine kinase homologs with 97% or more sequence coverage  
18 and 25% or more identity, like those from *E. coli* (4GCZ)<sup>21</sup> and *Geobacillus stearothermophilus*  
19 (3D36)<sup>22</sup>. Each homolog had a different relative orientation of the Dhp and CA domain  
20 equivalents, indicating that this target could only be successfully docked if the domains were  
21 correctly oriented in the monomers.

22

23 Models from CASP12 participants had a variety of different relative orientations of these two  
24 domains depending on the homolog template they chose. Using monomers with two different  
25 orientations, we generated 25,000 global docked models per orientation. Unfortunately, the  
26 relative orientations of the two CckA domains were very different from all available homologs as  
27 shown in Supplementary Figure S2B. Without a good monomer conformation, we, as well as all  
28 the other predictors, failed to dock the dimer correctly.

29

30

## 31 Heteromer docking successes

32

### 33 Target 120: Group 1 dockerin-cohesin complex

34

35 In anaerobic bacteria, the cellulosome assembly digests plant fibers. The assembly of this  
36 complex involves the binding of different enzyme-borne dockerin proteins (Doc) to cohesin  
37 modules of the non-enzymatic protein, scaffoldin (Sca). As different groups of dockerins have  
38 significantly different cohesin-binding interfaces, they have different binding modes for every  
39 cohesin.<sup>23</sup> Moreover, within the same species, each dockerin binds cohesins promiscuously and  
40 with different binding modes. Furthermore, single residue changes can affect binding,  
41 compounding the challenge of identifying the correct mode.<sup>24</sup> T120 was a hetero-dimer of ScaB3  
42 cohesin with Doc1a from *Ruminococcus flavefaciens*.

43

1 We started with homology models from CASP12 participants and relaxed them. Next, we  
2 searched for homologous complexes to create an initial placement of the monomers. A complex  
3 of group I dockerin and ScaB from *Acetivibrio cellulolyticus* (4UYQ)<sup>25</sup> provided a starting point  
4 despite low homology with the individual proteins—the cohesin had 24% sequence coverage  
5 with 33% identity and the dockerin had 79% coverage with 37% identity. Starting from an initial  
6 structure where the monomers were aligned to the homologous complex, we docked the target.  
7 While docking the proteins, we used an ensemble of 10 relaxed monomer models for each  
8 partner to explore alternate backbone conformations.

9  
10 Figure 2A shows our best model in green (cohesin) and blue (dockerin) against the crystal  
11 structure in gray. This model was adjudged to be acceptable; no other group submitted a higher-  
12 ranking model. The bulge in the crystal structure of cohesin (highlighted in red) was not present  
13 in any of the homology-modeled cohesins. This bulge changed the rigid-body conformation of  
14 the dockerin and resulted in the dockerin having an Lrmsd of 4.9 Å.

15  
16

#### 17 Target 122: Human IL-23–receptor complex

18

19 For T122, we were asked to model the interaction between IL-23 and its receptor, IL-23R. Several  
20 crystal structures of IL-23 were available in the Protein Data Bank.<sup>26</sup> A disulfide bond held  
21 together its two subunits, IL-23A and IL-23B and hence, we expected their bound state to remain  
22 largely unchanged. We modeled the receptor, IL-23R using Modeller<sup>27</sup> based on multiple  
23 sequence alignment of homologs with manual input on the alignment of loop regions. In addition,  
24 we also used models from Robetta,<sup>20</sup> which used a different homolog as its template.

25

26 From the variety of models obtained, it was apparent that the receptor might have inter-domain  
27 flexibility between its three domains. This flexibility ruled out the possibility of global docking. A  
28 literature survey revealed that the binding site observed in other cytokine/cytokine receptor  
29 complexes in this family was likely used to bind IL-12Rβ1, which was not the receptor chain we  
30 were modeling, and not IL-23R.<sup>28</sup> Based on prior experimental experience on IL-23 interactions,  
31 a collaborator (Jamie Spangler) advised us that the interaction was likely between the D1 domain  
32 of IL-23R and IL-23 with the conserved Trp-156 on IL-23B serving as the ‘lightning rod’. Using this  
33 information, we obtained a starting state and locally docked the receptor against the cytokine  
34 heterodimer while constraining the conserved tryptophan residue to contact the receptor. This  
35 was the first target for which we used RosettaDock 4.0, and as a result we were able to efficiently  
36 dock 65 receptor backbone conformations to 56 cytokine backbone conformations.

37

38 Figure 2B shows our best model superimposed on the crystal structure (5MZV, in gray)<sup>29</sup>. The  
39 conserved tryptophan of IL-23B is highlighted in red. This model was able to capture the rough  
40 binding mode along with the tryptophan lightning rod interaction. With 22% of the native  
41 contacts recovered and an Lrmsd of 0.7 Å, our model was adjudged acceptable. None of the  
42 models of IL-23R (yellow) had RMSD<sub>Cα</sub> under 4.2 Å because of the different orientations of the  
43 three domains and as a result the Lrmsd of the model was 16.8 Å. The best model across all the  
44 CAPRI groups was a medium-quality model with 40% of the native contacts.



## 1 Target 125: NKR-P1–LLT1 hetero-hexamer

2 T125 was the complex between the extracellular domains of natural killer cell surface receptor,  
3 NKR-P1 and a cell surface ligand, LLT1. It presented a three-step docking challenge: first, a dimer  
4 of NKR-P1 had to be modeled, then the LLT1–NKR-P1 hetero-trimer complex had to be  
5 determined, and finally, two of these hetero-trimers had to be docked together to construct the  
6 hetero-hexamer.

7  
8 For NKR-P1, we generated dimer models by symmetric docking of the monomer models of NKR-  
9 P1 obtained from Robetta. We chose seven dimer configurations for further docking. We then  
10 modeled the NKR-P1 dimer–LLT1 complex by global docking of the models using ClusPro followed  
11 by local refinement in Rosetta. A structure of LLT1 dimer was already available (4QKH); we used  
12 this as a reference to assemble the complex model. This step also filtered out trimer  
13 configurations that clashed with each other. Finally, we locally refined three candidate  
14 complexes, generating 5,000 models each.

15  
16 Our best model captured 40% of the native contacts on the LLT1–NKR-P1 with an *l*rmsd of 0.969  
17 Å and *l*rmsd of 1.971 Å and was classified as medium-quality. On *post ex facto* analysis, the  
18 closest docked conformation had an RMSD<sub>Cα</sub> of 4.7 Å from the crystal structure of NKR-P1  
19 homodimer (5MGS). As a result, we, as well as other predictors, could not predict the full  
20 hexamer correctly.

21  
22

## 23 Target 133: Colicin DNase–immunity protein complex

24  
25 T133 was a colicin E2 DNase–Im2 complex designed to change partner specificity from the native  
26 complex. The crystal structure of the native colicin E2 DNase–Im2 was available (3U43).<sup>30</sup>  
27 However, the organizers informed us that the mutations led to an altered binding mode.  
28 Therefore, the challenge of this target was recognizing changes in the binding mode brought  
29 about by the mutations. The designed colicin, E<sup>Des3</sup> had mutations in 17 of the 132 positions while  
30 the immunity protein Im<sup>Des3</sup> had 15 of its 85 positions mutated, most of which were situated in a  
31 loop. Three residues, identified as native-sequence hotspots for binding (Y54 and Y55 on Im2 plus  
32 F86 on E2),<sup>30</sup> were not changed. After mutating and refining the structures of the mutant  
33 proteins, we explored different conformations of the Im<sup>Des3</sup> loop with the mutations (residues  
34 20–35) and closed the loop with kinematic closure.<sup>31</sup> For E<sup>Des3</sup>, we obtained a variety of backbone  
35 conformations using Rosetta Backrub.<sup>32</sup> We then docked an ensemble of E<sup>Des3</sup> conformations  
36 with an ensemble of Im<sup>Des3</sup> conformations while constraining the three hotspot residues to  
37 interact.

38  
39 Figure 2C shows our best E<sup>des3</sup> (green)–Im<sup>Des3</sup> (blue) model (submitted as our 14<sup>th</sup> model)  
40 superimposed with the crystal structure (gray) of E<sup>des3</sup>–Im<sup>Des3</sup> complex (6ERE)<sup>33</sup>. Unfortunately,  
41 we predicted larger backbone changes (yellow) than were actually a part of the design (red). The  
42 hotspot residues (orange sticks) interact as predicted. This medium-quality model predicts 42%

1 of native contacts with 2.2 Å Irmsd and 4.1 Å Lrmsd. We only submitted acceptable structures in  
2 our top ten.

3  
4

### 5 Heteromer docking failures

6

#### 7 Target 113: Contact-dependent toxin–immunity protein complex

8 In T113, we were asked to model the interaction between the C-terminal domain of the toxin,  
9 CdiA-CT, and its cognate immunity protein, CdiI2 from *Cupriavidus taiwanensis*. We started with  
10 monomer models from the CASP12 predictors. We observed variability in the CdiA-CT models  
11 and consequently chose nine that had convergent secondary structure signatures for further  
12 modeling. There was less variability in CdiI2 models, but for the eleven-residue N-terminal tail.  
13 We chose three models with significantly different tail conformations from each other to hedge  
14 our bets. As we could not find a homologous complex, we searched the global conformational  
15 space using ClusPro<sup>34</sup> and chose the binding mode compatible with most of the monomer  
16 conformations. Restricting our search to the local space around this mode, we then docked the  
17 ensemble of nine CdiA-CT backbone with three CdiI2 backbones to generate 15,000 models. As  
18 we could not predict this tail conformation correctly in the model, we predicted the rigid body  
19 conformation of CdiA-CT incorrectly (see Supplementary Fig S2A). The best model across all  
20 groups was classified as acceptable.

21  
22

#### 23 Target 117: Pins–Insc tetramer

24 T117 was the tetrameric complex of two molecules of Pins, a cell polarity determining protein  
25 and two molecules of Insc, an adapter protein. A structure of the Pins monomer was available  
26 (3SF4). For the structure of Insc, we relied on models from CASP12 participants. Owing to the  
27 absence of close homologs, we obtained a variety of different models, which we then relaxed  
28 and clustered by similarity. The models that clustered most tightly still had a variety of  
29 conformations of the first 35 (N-terminal) residues, which we consequently truncated. Based on  
30 literature,<sup>35</sup> we decided to construct a homo-dimer of hetero-dimer model, where we first  
31 docked the Insc to Pins, generating 50,000 models, then selected an ensemble of 15 distinct top-  
32 scoring dimers, and finally we symmetrically docked the dimers, starting from four distinct  
33 orientations, and generating 50,000 models for each orientation.

34

35 The crystal structure of the complex (5A7D, see Supplementary Fig S2C) is a homo-dimer of two  
36 hetero-dimers as we predicted, but is not symmetric. The primary contacts of Insc in each hetero-  
37 dimer unit occur in the thirty-residue unfolded N-terminal peptide, Insc<sup>PEPT</sup>. As a result, there is  
38 a large amount of conformational flexibility in the hetero-dimer subcomplex with the two  
39 subcomplexes in the crystal structure having significantly different conformations. We had  
40 truncated this peptide and hence could not model either the hetero-subcomplex or the whole

1 complex correctly. This was arguably the hardest challenge of round 37 because it involved not  
2 only multi-body docking, but also predicting the interactions of an unfolded peptide stretch with  
3 large conformational flexibility. No CAPRI team submitted an acceptable or better model.  
4

#### 5 Targets 123 & 124: PorM–camelid nanobody complex

6 T123 and T124 comprised the N- and C- terminal domains (respectively) of PorM, a periplasmic  
7 member of the type IX secretion system found in *Porphyromonas gingivalis*, in complex with  
8 nanobody chaperones. In their presence, the N-terminal domain crystallized as a monomer  
9 whereas the C-terminal domain crystallized as a dimer. Generally, nanobodies recognize antigens  
10 primarily by interactions in three variable loops called H1, H2 and H3. The H3 loop is the longest  
11 and most flexible loop, and as a result it is the primary determinant of binding. Thus, we modeled  
12 the constant core of the nanobody and the H1 and H2 loops from available homologs and then  
13 we generated 1,000 models with different H3 loop conformations using RosettaAntibody.<sup>36,37</sup> In  
14 T123, PorM<sub>N-term</sub> in complex with nb02, the H3 loop was 12 residues long, whereas in T124,  
15 PorM<sub>C-term</sub> dimer in complex with nb130, the H3 was 21 residues long.  
16

17 For T123, we obtained PorM<sub>N-term</sub> models from Robetta. For T124, we obtained PorM<sub>C-term</sub>  
18 monomer conformations from Robetta and docked them together symmetrically to attain a  
19 dimer configuration. In both cases, no homologs were available as templates and hence the  
20 monomers were modeled *de novo* from sequence, which was a source of error. Using the lowest-  
21 scoring PorM models, we searched for suitable nanobody-binding regions by global docking using  
22 ClusPro. We then refined the distinct binding modes obtained from ClusPro while simultaneously  
23 sampling various nanobody variable loop conformations using SnugDock,<sup>3,36</sup> a variant of  
24 RosettaDock specialized for docking antibodies.  
25

26 For T123, the PorM<sub>N-term</sub>–nb02 complex, we did not produce an acceptable model or better. Since  
27 the structure is not yet released, we cannot analyze the reason for our failure. Only one  
28 acceptable solution was submitted across all participants. T124, the PorM<sub>C-term</sub> dimer–nb130,  
29 complex involved multiple challenges: modeling monomers without templates, predicting their  
30 dimeric form and then docking the nanobody correctly (see Supplementary Figure S3A). All our  
31 PorM<sub>C-term</sub> monomeric models were incorrect. Although we were able to model the nb02 H3 loop  
32 within 2.4 Å RMSD<sub>C $\alpha$</sub> , all our complex models had an Lrmsd of more than 18 Å. As a result, we, as  
33 well as all the other participants, failed to model this complex correctly.  
34

#### 35 Targets 131 & 132: CEACAM1–HopQ complex

36 T131 and T132 were the complexes of *Helicobacter pylori* adhesins HopQ1 and HopQ2,  
37 respectively, bound to the N-terminal domain of cell adhesion molecule CEACAM1. Multiple  
38 structures were available for the N-terminal domain of CEACAM1 (2GK2, 4QXW, 4WHD, and  
39 5DZL).<sup>38,39</sup> For T131, the structure of HopQ1 was available with four loops missing at the putative  
40 binding interface (5LP2).<sup>40</sup> Using this structure as a template, complete models were obtained

1 from Robetta. Robetta produced different conformations for the two longest loops (residues  
2 135–148 and 245–255), which suggested potential flexibility. A mutation study indicated that  
3 residues Y34 and I91 of CEACAM1 are essential for HopQ binding.<sup>41</sup> The authors of the study also  
4 conjectured that the first long loop of HopQ1 is involved in binding CEACAMs. We modeled the  
5 missing loop using fragment insertion and closed the loop with cyclic coordinate descent.<sup>42</sup> Using  
6 an ensemble of 200 different loop conformations for the first HopQ1 loop and constraints to  
7 ensure CEACAM1 Y34 and I91 contact HopQ1, we generated 10,000 models each from two  
8 different starting states. For T132, we modeled the structure of the HopQ2 monomer based on  
9 its homology to HopQ1 using Rosetta Remodel.<sup>43</sup> We followed a similar protocol for HopQ1 loop  
10 conformation sampling (for a slightly shorter loop of residues 135–144) and docking.

11  
12 In both the cases, our loop modeling methods failed to provide the necessary bound  
13 conformation, often producing extended loops, instead of the compact structure in the crystal.  
14 As a result, the rigid-body orientation of CEACAM1 was completely incorrect. The two CEACAM1  
15 residues predicted to be at the interface were indeed found to be there and are shown as salmon  
16 sticks in Supplementary Figure S3B.

17  
18 While we did not predict the structure correctly, we did successfully refine and score structures  
19 submitted by another group. Our best refined model was classified as acceptable with 27% of  
20 native contacts predicted, Lrmsd and Irmsd of 11.8 Å and 3.2 Å, respectively. This demonstrates  
21 that the *REF2015* score function<sup>44</sup> can recognize the near-native structure. Therefore, the  
22 outstanding challenge is to sample the conformation *de novo*.

23  
24

## 25 Protein–Oligosaccharide docking

### 26 Targets 126–130: Arabino-oligosaccharide binding to proteins

27 In round 41 of CAPRI, we modeled the interaction between arabino-oligosaccharide ligands of  
28 different lengths and the arabinose sensor, AbnE, or the arabinanase, AbnB — two important  
29 components of the L-arabinan-utilization system of *Geobacillus stearothermophilus*. Specifically,  
30 T126–129 challenged us with the docking of 1,5- $\alpha$ -L-arabinohexose (A6) through 1,5- $\alpha$ -L-  
31 arabinotriose (A3), respectively, to AbnE. T130 involved the docking of A5 to a catalytic mutant  
32 (E201A) of AbnB.

33  
34 We modeled AbnE from homologs with 95% or more sequence coverage and 25% or more  
35 identity using Modeller<sup>27</sup> and relaxed the models in Rosetta.<sup>45</sup> Additionally, we obtained models  
36 from the Robetta server.<sup>20</sup> One of the homologs that we used to model the target, the maltose-  
37 binding protein GacH from *Streptomyces glaucescens*, exists in two conformations: an unliganded  
38 open conformation and a closed, ligand-bound conformation.<sup>46</sup> From all the aforementioned  
39 protein models, we used the conformation closest to the ligand-bound GacH conformation to  
40 model T126–129. As the chemical description of arabinose was absent in Rosetta, we  
41 programmed the required geometry, partial charge, and chemical connectivity information to  
42 model arabinose ligands with the RosettaCarbohydrate framework.<sup>9</sup> To obtain a starting

1 structure, we superimposed the AbnE model and A4 onto maltotetraose-bound GacH (3K00)<sup>46</sup>,  
2 changing the backbone torsion angles of A4 to best align with maltotetraose. For A5 and A6, we  
3 added arabinose units to the non-reducing end of the ligand. For A3, we removed an arabinose  
4 unit from the non-reducing end.

5  
6 To simultaneously dock the glyco-ligands and explore their backbone conformations, we used  
7 the new GlycanDock protocol in Rosetta.<sup>9</sup> In this protocol, the glyco-ligand undergoes small  
8 backbone motions along with rigid-body moves to dock into a protein cavity. These perturbations  
9 are alternated with side-chain repacking and energy minimization in torsion space for the  
10 residues at the protein–glycan interface. For each target, we obtained 15,000 initial docked  
11 models without any constraints to relieve clashes and to broadly sample the rigid-body  
12 conformational space. From the models where the ligands moved less than 5 Å RMSD from the  
13 starting structure, *i.e.*, those that stayed in the binding pocket of AbnE, we selected the one with  
14 the lowest interaction energy as the starting model for the final simulation. For the final docking  
15 simulation, we added constraints to hold the glyco-ligands within the putative binding pocket of  
16 AbnE and generated another 15,000 models. The range of conformations explored by A6 in T126  
17 is exemplified in Figure 3A. We predicted medium quality models for T129 and acceptable-quality  
18 models for T127 and T128. During scoring, we recognized acceptable models for T126–T129, thus  
19 validating the score function.

20  
21 For T130, the crystal structure of A3 bound to the E201A mutant of the glycosidase AbnB was  
22 already available (3D5Z). The active site of this enzyme is a long groove with a bridge connecting  
23 the brinks under which the ligand can slide (see Figure 3B). The enzyme cleaves glycosidic linkages  
24 indiscriminately<sup>47</sup> as the groove offers no steric obstruction at either end to hold the substrate in  
25 place. Consequently, although a structure was available with A3, we could not *a priori* predict  
26 how the A5 ligand would position itself. Extending the A3 in either direction provided us with  
27 starting coordinates for three unique starting states. We generated 10,000 docked models each  
28 from the three starting states using GlycanDock while constraining the A5 ligand to the active site  
29 groove. Figure 3B shows the best predicted conformation of A5 (in green) superimposed on the  
30 crystal structure of AbnB<sub>E201A</sub> (light gray)–A5 (dark gray) complex (6F1G). The structure is a  
31 medium-quality model with 63% of the contacts being recovered with an Irmsd of 1.58 Å and an  
32 Lrmsd of 4.22 Å.

33  
34  
35 Post-hoc analysis of GlycanDock sampling and scoring

36  
37 Compared to the crystal structure (6F1G), the three A5 structures we used as input for the T130  
38 prediction round had a high fraction of native contacts (0.267, 0.367, and  
39 0.633, respectively). We examined the failure of Rosetta GlycanDock to produce a high-quality  
40 structure despite having favorable starting states by investigating the Rosetta scoring function  
41 and an updated sampling algorithm in the version of GlycanDock under development.

42  
43 To test scoring, we refined the crystal structure to generate 50 models. All models had sub-  
44 Angstrom RMSDs (purple triangles in Supplementary Figure S4) with interaction scores more

1 favorable than those of the submitted models; the lowest-scoring model had a score of -  
2 24.9 units for the crystal refinement versus -13.9 units for the submitted models. This  
3 result suggests that, had it been sampled, the Rosetta scoring function would have correctly  
4 identified a near-native structure.

5  
6 Despite having favorable starting conformations and a score function that discriminates near-  
7 native models, the previous version of GlycanDock failed to sample native-like states. The  
8 primary reason was that the first step of the algorithm randomized glycan backbone torsions as  
9 well as the rotation of the glycan about the protein, both of which disrupted favorable starting  
10 structures. As a result, this initial perturbation is not as extensive in the updated version.

11  
12 To diagnose our current limitations, we tested two aspects of sampling—the rigid-body  
13 orientation sampling and the glycan backbone conformation sampling—individually at first and  
14 then, simultaneously. To remove any bias from the protein backbone conformation in the crystal,  
15 we used the protein backbone that we used for the prediction round. As a best-case scenario, we  
16 aligned the crystal structure of the A5 glycan in the protein groove as observed in the crystal  
17 structure. We generated 500 models by perturbing the glycan conformation  
18 ( $0.5 \text{ \AA}$  translation,  $7.5^\circ$  rotation, and backbone torsion perturbation between  $\pm 12.5^\circ$ ) and then  
19 refining it. As expected, we successfully generated and discriminated near-native decoys even  
20 when starting with structures with an average Lrmsd of  $1.98 \text{ \AA}$  (Supplementary Figure S4A). Next,  
21 we examined rigid-body sampling by moving the A5 crystal structure away from the binding  
22 pocket by assigning it *de novo* coordinates. Starting with this orientation and employing the same  
23 protocol, we generated high-quality models with RMSDs similar to those observed in crystal  
24 structure refinement (Supplementary Figure S4B). To examine glycan backbone sampling, we  
25 aligned the three input A5 structures used for the prediction round in the protein groove as in  
26 the crystal structure and generated 1000 docked models for each input. We were unable to  
27 obtain any high-quality models; all models had Lrmsd greater than  $2 \text{ \AA}$  (Supplementary Figure  
28 S4C). Finally, we tested both rigid-body and backbone sampling simultaneously by placing the  
29 three input A5 structures used for the prediction outside the binding groove and then docking.  
30 We achieved similar results as in the previous case (Supplementary Figure S4D). These results  
31 suggest GlycanDock adequately samples rigid-body orientations but fails to do so for glycan  
32 backbone conformation. Thus, the key to successfully dock glycans lies in sampling relevant  
33 glycan backbone torsion.

34



## 1 Discussion

2  
3 Previous rounds of CAPRI led to the development of niche protocols like SnugDock<sup>3</sup> to model  
4 antibody–antigen binding and pHDock<sup>4</sup> to dynamically sample residue protonation states while  
5 docking.<sup>6</sup> In rounds 37–45, we utilized these specialized methods while also encountering  
6 challenges that require overhauls of the core methodology for general problems such as global  
7 docking with flexibility, global docking of symmetric homomers, and oligosaccharide–protein  
8 docking. We modeled backbone flexibility by incorporating a pre-generated ensemble of  
9 backbone conformations during docking. With RosettaDock 4.0,<sup>8</sup> we sampled over fifty  
10 conformations for each partner to successfully model T122. Despite having an efficient backbone  
11 sampling algorithm, we failed to model T131 and T132 due to the absence of conformations  
12 where the interacting loops were in near-bound conformation. These failures highlight the need  
13 for ensemble generation methods that sample loop conformations broadly.

14  
15 As many of the targets were symmetric homomers with varying degrees of homology to existing  
16 structures, we were able to thoroughly assess the Rosetta SymDock protocol. When homologs  
17 were present, we could borrow the symmetric arrangement from the homolog as a template, as  
18 we did to successfully model targets 110, 111, 112, 118, and 119. However, even in those cases,  
19 the proximity of the monomer backbone to the template monomer backbone determined the  
20 overall quality of the models. For example, the monomer model of T111 had a 0.8 Å RMSD<sub>Cα</sub> from  
21 the template and was our only prediction to be classified as high-quality. While one would expect  
22 that the more closely related a template is, the better the model will be, we noticed a systematic  
23 pattern of error in tightly-packed, higher order complexes. The method of induced fit successfully  
24 used for T136 inspired the flexible-backbone refinement strategy of the new symmetric docking  
25 protocol, Rosetta SymDock2.<sup>11</sup>

26  
27 For only the second time in CAPRI, we encountered oligosaccharide–protein complexes. Five  
28 targets in round 41 gave us an opportunity to work with the recently-developed  
29 RosettaCarbohydrate framework,<sup>9</sup> especially the GlycanDock application therein.  
30 Oligosaccharides have many more degrees of freedom than peptides, often featuring an  
31 additional mobile backbone torsion angle, multiple mobile side chains, and sometimes flexible  
32 rings. GlycanDock samples these mobile dihedrals while performing rigid-body transformations  
33 to place the oligosaccharide in a binding pocket and simultaneously repacking the side chains of  
34 contacting protein residues. We recognized deficiencies in the sampling of GlycanDock, and  
35 ongoing developments focus on optimizing its conformation sampling capabilities for a variety of  
36 glyco-ligands. Certain glycosidic linkages have been observed to populate limited regions of  
37 torsion space and for these linkages, glycosidic torsion angle preferences and crystal structure-  
38 based statistics have been calculated and collected.<sup>48,49</sup> For the arabinose–arabinose linkages  
39 present in T130, linkage torsional statistics have not yet been collected, nor have the linkage-  
40 conformation energies been calculated. These data, when incorporated into glycan docking  
41 algorithms, could narrow the search space in glycan conformation sampling.<sup>9,49</sup> In addition, some  
42 groups that participated in round 41 included a term in their scoring function to encourage  
43 individual arabinose units to remain in a parallel stacking orientation with nearby aromatic  
44 residues in the active site. This type of protein–carbohydrate interaction, known as a CH–π

1 interaction, has been well characterized in carbohydrate-binding proteins and is understood to  
2 play an important role in carbohydrate binding and recognition.<sup>50,51</sup> The Rosetta software suite  
3 does not currently employ a scoring term to encourage this type of geometry-driven  
4 intermolecular interaction, and it might help further discriminate native-like oligosaccharide–  
5 protein interactions.

6  
7 With fourteen successful predictions and two additional scoring successes, our performance in  
8 the rounds evaluated thus far was commensurate with other leading groups in the rounds we  
9 participated. Of our nine docking failures, we believe, retrospectively, that we had the sampling  
10 techniques available in Rosetta to better model targets 113, 126, 131, and 132. On the other  
11 hand, targets 114, 116, 117, 123, and 124 required blind prediction tools that do not yet exist  
12 and as a result, they did not elicit a successful model from any predictor. Broadly, the challenges  
13 that caused the most failures were docking with large conformational changes and multi-body  
14 docking (especially higher order heteromers). These community-wide failures highlight the  
15 massive gaps that still need to be addressed to fulfill the overarching goal of reliably modeling  
16 entire interactomes.<sup>52–54</sup>

17  
18

## 19 Acknowledgments

20

21 This work has been supported by grants from the National Institutes of Health, USA, *viz.* grants  
22 R01-GM078221 (JJG, SSRB, MLN, JRJ, JWL), T32-GM008403 (MLN, JRJ), F32-CA189246 (JWL) and  
23 F31-GM123616 (JRJ) and the National Science Foundation, USA award 1507736. Computations  
24 in this study have been performed in part on the Maryland Advanced Research Computing Center  
25 (MARCC) Blue Crab cluster. The authors thank Prof. Jamie Spangler of Johns Hopkins University  
26 for her advice on target 122.

27  
28

## 29 Conflict of Interest

30

31 J.J.G. is an unpaid board member of the Rosetta Commons. Under institutional participation  
32 agreements between the University of Washington, acting on behalf of the Rosetta Commons,  
33 Johns Hopkins University may be entitled to a portion of revenue received on licensing Rosetta  
34 software, which may include methods described in this paper. As a member of the Scientific  
35 Advisory Board of Cyrus Biotechnology, J.J.G. is granted stock options. Cyrus Biotechnology  
36 distributes the Rosetta software, which may include methods described in this paper.

37

## 1   References

- 2
- 3   1.    Méndez R, Leplae R, De Maria L, Wodak SJ. Assessment of blind predictions of protein-
- 4        protein interactions: Current status of docking methods. *Proteins Struct Funct Bioinforma.*
- 5        2003;52(1):51-67.
- 6   2.    Gray JJ, Moughon S, Wang C, et al. Protein–Protein Docking with Simultaneous
- 7        Optimization of Rigid-body Displacement and Side-chain Conformations. *J Mol Biol.*
- 8        2003;331(1):281-299.
- 9   3.    Sircar A, Gray JJ. SnugDock: Paratope Structural Optimization during Antibody-Antigen
- 10       Docking Compensates for Errors in Antibody Homology Models. *PLoS Comput Biol.*
- 11       2010;6(1):e1000644.
- 12   4.    Kilambi KP, Reddy K, Gray JJ. Protein-Protein Docking with Dynamic Residue Protonation
- 13       States. *PLoS Comput Biol.* 2014;10(12):e1004018.
- 14   5.    Chaudhury S, Gray JJ. Conformer Selection and Induced Fit in Flexible Backbone Protein-
- 15       Protein Docking Using Computational and NMR Ensembles. *J Mol Biol.* 2008;381(4):1068-
- 16       1087.
- 17   6.    Kilambi KP, Pacella MS, Xu J, et al. Extending RosettaDock with water, sugar, and pH for
- 18       prediction of complex structures and affinities for CAPRI rounds 20-27. *Proteins Struct*
- 19       *Funct Bioinforma.* 2013;81(12):2201-2209.
- 20   7.    Marze NA, Jeliaskov JR, Roy Burman SS, Boyken SE, DiMaio F, Gray JJ. Modeling oblong
- 21       proteins and water-mediated interfaces with RosettaDock in CAPRI rounds 28-35. *Proteins*
- 22       *Struct Funct Bioinforma.* 2017;85(3):479-486.
- 23   8.    Marze NA, Roy Burman SS, Sheffler W, Gray JJ. Efficient flexible backbone protein–protein
- 24       docking for challenging targets. *Bioinformatics.* April 2018.
- 25   9.    Labonte JW, Adolf-Bryfogle J, Schief WR, Gray JJ. Residue-centric modeling and design of
- 26       saccharide and glycoconjugate structures. *J Comput Chem.* 2017;38(5):276-287.
- 27   10.   Lensink MF, Velankar S, Baek M, Heo L, Seok C, Wodak SJ. The challenge of modeling
- 28       protein assemblies: the CASP12-CAPRI experiment. *Proteins Struct Funct Bioinforma.*
- 29       2018;86:257-273.
- 30   11.   Roy Burman SS, Yovanno RA, Gray JJ. Flexible Backbone Assembly and Refinement of
- 31       Symmetrical Homomeric Complexes. *Structure.* 2019;27(6):1041-1051.
- 32   12.   Tyka MD, Keedy D a., André I, et al. Alternate states of proteins revealed by detailed energy
- 33       landscape mapping. *J Mol Biol.* 2011;405(2):607-618.
- 34   13.   Singh AK, Menéndez-Conejero R, San Martín C, van Raaij MJ. Crystal Structure of the Fibre
- 35       Head Domain of the Atadenovirus Snake Adenovirus 1. *PLoS One.* 2014;9(12):e114373.
- 36   14.   Guardado-Calvo P, Llamas-Saiz AL, Fox GC, Langlois P, van Raaij MJ. Structure of the C-
- 37       terminal head domain of the fowl adenovirus type 1 long fiber. *J Gen Virol.*
- 38       2007;88(9):2407-2416.

- 1 15. André I, Bradley P, Wang C, Baker D. Prediction of the structure of symmetrical protein  
2 assemblies. *Proc Natl Acad Sci.* 2007;104(45):17656-17661.
- 3 16. Nguyen TH, Ballmann MZ, Do HT, et al. Crystal structure of raptor adenovirus 1 fibre head  
4 and role of the beta-hairpin in siadenovirus fibre head domains. *Virology.* 2016;13(1):106.
- 5 17. Fushinobu S, Nishimasu H, Hattori D, Song H-J, Wakagi T. Structural basis for the  
6 bifunctionality of fructose-1,6-bisphosphate aldolase/phosphatase. *Nature.*  
7 2011;478(7370):538-541.
- 8 18. Grötzinger SW, Karan R, Strillinger E, et al. Identification and Experimental  
9 Characterization of an Extremophilic Brine Pool Alcohol Dehydrogenase from Single  
10 Amplified Genomes. *ACS Chem Biol.* 2018;13(1):161-170.
- 11 19. Moon J-H, Lee H-J, Park S-Y, et al. Structures of Iron-Dependent Alcohol Dehydrogenase 2  
12 from *Zymomonas mobilis* ZM4 with and without NAD<sup>+</sup> Cofactor. *J Mol Biol.*  
13 2011;407(3):413-424.
- 14 20. Song Y, DiMaio F, Wang RY-R, et al. High-Resolution Comparative Modeling with  
15 RosettaCM. *Structure.* 2013;21(10):1735-1742.
- 16 21. Diensthuber RP, Bommer M, Gleichmann T, Möglich A. Full-Length Structure of a Sensor  
17 Histidine Kinase Pinpoints Coaxial Coiled Coils as Signal Transducers and Modulators.  
18 *Structure.* 2013;21(7):1127-1136.
- 19 22. Bick MJ, Lamour V, Rajashankar KR, Gordiyenko Y, Robinson C V., Darst SA. How to Switch  
20 Off a Histidine Kinase: Crystal Structure of *Geobacillus stearothermophilus* KinB with the  
21 inhibitor Sda. *J Mol Biol.* 2009;386(1):163-177.
- 22 23. Bule P, Alves VD, Israeli-Ruimy V, et al. Assembly of *Ruminococcus flavefaciens* cellulosome  
23 revealed by structures of two cohesin-dockerin complexes. *Sci Rep.* 2017;7(1):759.
- 24 24. Slutzki M, Reshef D, Barak Y, et al. Crucial roles of single residues in binding affinity,  
25 specificity, and promiscuity in the cellulosomal cohesin-dockerin interface. *J Biol Chem.*  
26 2015;290(22):13654-13666.
- 27 25. Cameron K, Najmudin S, Alves VD, et al. Cell-surface Attachment of Bacterial Multienzyme  
28 Complexes Involves Highly Dynamic Protein-Protein Anchors. *J Biol Chem.*  
29 2015;290(21):13578-13590.
- 30 26. Berman HM. The Protein Data Bank. *Nucleic Acids Res.* 2000;28(1):235-242.
- 31 27. Eswar N, Webb B, Marti-Renom MA, et al. Comparative Protein Structure Modeling Using  
32 Modeller. *Curr Protoc Bioinforma.* 2006;15(1):5.6.1-5.6.30.
- 33 28. Schröder J, Moll JM, Baran P, Grötzinger J, Scheller J, Floss DM. Non-canonical interleukin  
34 23 receptor complex assembly: p40 protein recruits interleukin 12 receptor  $\beta$ 1 via site II  
35 and induces p19/interleukin 23 receptor interaction via site III. *J Biol Chem.*  
36 2015;290(1):359-370.
- 37 29. Bloch Y, Bouchareychas L, Merceron R, et al. Structural Activation of Pro-inflammatory  
38 Human Cytokine IL-23 by Cognate IL-23 Receptor Enables Recruitment of the Shared

- 1 Receptor IL-12R $\beta$ 1. *Immunity*. 2018;48(1):45-58.e6.
- 2 30. Wojdyla JA, Fleishman SJ, Baker D, Kleanthous C. Structure of the Ultra-High-Affinity  
3 Colicin E2 DNase–Im2 Complex. *J Mol Biol*. 2012;417(1-2):79-94.
- 4 31. Stein A, Kortemme T. Improvements to Robotics-Inspired Conformational Sampling in  
5 Rosetta. *PLoS One*. 2013;8(5):e63090.
- 6 32. Smith CA, Kortemme T. Backrub-like backbone simulation recapitulates natural protein  
7 conformational variability and improves mutant side-chain prediction. *J Mol Biol*.  
8 2008;380(4):742-756.
- 9 33. Netzer R, Listov D, Lipsh R, et al. Ultrahigh specificity in a network of computationally  
10 designed protein-interaction pairs. *Nat Commun*. 2018;9(1):5286.
- 11 34. Kozakov D, Hall DR, Xia B, et al. The ClusPro web server for protein–protein docking. *Nat*  
12 *Protoc*. 2017;12(2):255-278.
- 13 35. Culurgioni S, Mari S, Bonetti P, et al. Insc:LGN tetramers promote asymmetric divisions of  
14 mammary stem cells. *Nat Commun*. 2018;9(1):1025.
- 15 36. Sircar A, Sanni KA, Shi J, Gray JJ. Analysis and Modeling of the Variable Region of Camelid  
16 Single-Domain Antibodies. *J Immunol*. 2011;186(11):6357-6367.
- 17 37. Weitzner BD, Jeliaskov JR, Lyskov S, et al. Modeling and docking of antibody structures  
18 with Rosetta. *Nat Protoc*. 2017;12(2):401-416.
- 19 38. Fedarovich A, Tomberg J, Nicholas RA, Davies C. Structure of the N-terminal domain of  
20 human CEACAM1: Binding target of the opacity proteins during invasion of *Neisseria*  
21 *meningitidis* and *N. gonorrhoeae*. *Acta Crystallogr Sect D Biol Crystallogr*. 2006;62(9):971-  
22 979.
- 23 39. Huang Y-H, Zhu C, Kondo Y, et al. CEACAM1 regulates TIM-3-mediated tolerance and  
24 exhaustion. *Nature*. 2015;517(7534):386-390.
- 25 40. Moonens K, Hamway Y, Neddermann M, et al. *Helicobacter pylori* adhesin HopQ disrupts  
26 trans dimerization in human CEACAMs. *EMBO J*. 2018;37(13):e98665.
- 27 41. Javaheri A, Kruse T, Moonens K, et al. *Helicobacter pylori* adhesin HopQ engages in a  
28 virulence-enhancing interaction with human CEACAMs. *Nat Microbiol*. 2017;2(1):16189.
- 29 42. Canutescu AA, Dunbrack RL. Cyclic coordinate descent: A robotics algorithm for protein  
30 loop closure. *Protein Sci*. 2003;12(5):963-972.
- 31 43. Huang P-S, Ban Y-EA, Richter F, et al. RosettaRemodel: A Generalized Framework for  
32 Flexible Backbone Protein Design. *PLoS One*. 2011;6(8):e24109.
- 33 44. Alford RF, Leaver-Fay A, Jeliaskov JR, et al. The Rosetta All-Atom Energy Function for  
34 Macromolecular Modeling and Design. *J Chem Theory Comput*. 2017;13(6):3031-3048.
- 35 45. Tyka MD, Keedy DA, André I, et al. Alternate states of proteins revealed by detailed energy  
36 landscape mapping. *J Mol Biol*. 2011;405(2):607-618.
- 37 46. Vahedi-Faridi A, Licht A, Bulut H, et al. Crystal Structures of the Solute Receptor GacH of  
38 *Streptomyces glaucescens* in Complex with Acarbose and an Acarbose Homolog:

- 1 Comparison with the Acarbose-Loaded Maltose-Binding Protein of *Salmonella*  
2 *typhimurium*. *J Mol Biol.* 2010;397(3):709-723.
- 3 47. Alhassid A, Ben-David A, Tabachnikov O, et al. Crystal structure of an inverting GH 43 1,5-  
4 alpha-L-arabinanase from *Geobacillus stearothermophilus* complexed with its substrate.  
5 *Biochem J.* 2009;422(1):73-82.
- 6 48. Lütteke T, Bohne-Lang A, Loss A, Goetz T, Frank M, von der Lieth C-W. GLYCOSCIENCES.de:  
7 an Internet portal to support glycomics and glycobiology research. *Glycobiology.*  
8 2006;16(5):71R-81R.
- 9 49. Nivedha AK, Thieker DF, Makeneni S, Hu H, Woods RJ. Vina-Carb: Improving Glycosidic  
10 Angles during Carbohydrate Docking. *J Chem Theory Comput.* 2016;12(2):892-901.
- 11 50. Spiwok V. CH/ $\pi$  Interactions in Carbohydrate Recognition. *Molecules.* 2017;22(7):1038.
- 12 51. Hudson KL, Bartlett GJ, Diehl RC, et al. Carbohydrate–Aromatic Interactions in Proteins. *J*  
13 *Am Chem Soc.* 2015;137(48):15152-15160.
- 14 52. Mosca R, Pons T, Céol A, Valencia A, Aloy P. Towards a detailed atlas of protein–protein  
15 interactions. *Curr Opin Struct Biol.* 2013;23(6):929-940.
- 16 53. Wodak SJ, Vlasblom J, Turinsky AL, Pu S. Protein–protein interaction networks: the puzzling  
17 riches. *Curr Opin Struct Biol.* 2013;23(6):941-953.
- 18 54. Vakser IA. Protein-protein docking: from interaction to interactome. *Biophys J.*  
19 2014;107(8):1785-1793.  
20



**Table 1: Summary of targets successfully modeled.** The table lists the round, target number, name of the complex, the nature of the challenge, the methods used to model the complex, and the evaluation metrics for the best model that we submitted. The metrics are  $f_{\text{nat}}$ : the fraction of native contacts recovered, Lrmsd: root-mean-square-deviation of the backbone atoms from the native ligand after superimposing the receptor, Irmsd: root-mean-square-deviation of the backbone atoms of the interface after superposition to the bound interface, and quality: high-quality (\*\*\*) , medium-quality (\*\*), acceptable (\*), or incorrect (-) as evaluated by the CAPRI organizers.

| Round | Target. Interface # | Complex Name                                                   | Challenge                                        | Method(s) Used                               | Best Model Evaluation |           |           |         |
|-------|---------------------|----------------------------------------------------------------|--------------------------------------------------|----------------------------------------------|-----------------------|-----------|-----------|---------|
|       |                     |                                                                |                                                  |                                              | $f_{\text{nat}}$      | Lrmsd (Å) | Irmsd (Å) | Quality |
| 37    | 110                 | Fibre head domain of raptor adenovirus 1                       | Symmetric docking based on homolog               | SymDock local refinement                     | 0.67                  | 2.35      | 1.73      | **      |
|       | 111                 | Fibre head domain of lizard adenovirus 2                       | Symmetric docking based on homolog               | SymDock local refinement                     | 0.75                  | 0.98      | 0.73      | ***     |
|       | 112                 | Fibre head domain of goose adenovirus 4                        | Symmetric docking based on homolog               | SymDock local refinement                     | 0.38                  | 5.81      | 2.90      | *       |
|       | 118.1               | Fructose biphosphatase                                         | Symmetric docking based on homolog               | SymDock local refinement                     | 0.41                  | 1.72      | 1.07      | **      |
|       | 119                 | Alcohol dehydrogenase                                          | pH-dependent symmetric docking based on homolog  | SymDock local refinement, pHDock             | 0.61                  | 9.92      | 2.99      | *       |
|       | 120                 | Group 1 dockerin-cohesin complex                               | Local docking based on homomer                   | RosettaDock with ensembles                   | 0.25                  | 4.96      | 3.80      | *       |
| 39    | 122                 | IL-23-receptor complex                                         | Multi-body docking, global docking               | RosettaDock with ensembles                   | 0.22                  | 16.86     | 0.70      | *       |
| 40    | 125.1               | NKR-P1-LLT1 complex                                            | Multi-body docking, symmetric global docking     | ClusPro, RosettaDock with ensembles, SymDock | 0.40                  | 1.97      | 0.97      | **      |
| 41    | 127                 | 1,5- $\alpha$ -L-arabinopentose bound to AbnE                  | Oligosaccharide docking                          | GlycanDock                                   | 0.11                  | 6.78      | 2.99      | *       |
|       | 128                 | 1,5- $\alpha$ -L-arabinotetrose bound to AbnE                  | Oligosaccharide docking                          | GlycanDock                                   | 0.15                  | 7.79      | 2.94      | *       |
|       | 129                 | 1,5- $\alpha$ -L-arabinotriose bound to AbnE                   | Oligosaccharide docking                          | GlycanDock                                   | 0.48                  | 2.78      | 1.84      | **      |
|       | 130                 | 1,5- $\alpha$ -L-arabinopentose bound to AbnB <sub>E201A</sub> | Oligosaccharide docking                          | GlycanDock                                   | 0.63                  | 4.22      | 1.58      | **      |
| 43    | 133                 | Designed colicin E2-Im2 complex                                | Loop modeling, docking based on homolog          | KIC, RosettaDock with ensembles              | 0.45                  | 5.58      | 4.26      | *       |
| 45    | 136.1               | Lysine decarboxylase                                           | Symmetric docking based on homolog, complex size | Constrained relax, SymDock local refinement  | 0.58                  | 2.70      | 1.68      | **      |

**Table 3.2: Summary of targets modeled incorrectly.** ‘Best in CAPRI’ corresponds to the model evaluation of the best model submitted by all CAPRI predictors (not scorers). The description of the other headers is the same as in Table 1.

| Round | Target. Interface # | Complex Name                                 | Challenge                                        | Method(s) Used                              | Best Model Evaluation |           |           |               |
|-------|---------------------|----------------------------------------------|--------------------------------------------------|---------------------------------------------|-----------------------|-----------|-----------|---------------|
|       |                     |                                              |                                                  |                                             | $f_{\text{nat}}$      | Lrmsd (Å) | Irmsd (Å) | Best in CAPRI |
| 37    | 113                 | CDI toxin–immunity complex                   | Flexible loop, global docking                    | ClusPro, RosettaDock with ensembles         | 0.06                  | 18.33     | 11.43     | *             |
|       | 114                 | Ljungan virus protein                        | Low-quality monomer, symm. global docking        | SymDock with ensembles                      | 0.01                  | 47.75     | 10.83     | -             |
|       | 116                 | Bifunctional histidine kinase                | Variable domain linker, symmetric global docking | SymDock with ensembles                      | 0.09                  | 36.02     | 11.86     | -             |
|       | 117.2               | Pins–Insc complex                            | Partial monomer unfolding, multi-body docking    | RosettaDock with ensembles, SymDock         | 0.00                  | 80.39     | 36.13     | -             |
| 39    | 123                 | PorM <sub>N-term</sub> –nb130 complex        | Loop flexibility, global docking                 | RosettaAntibody, SnugDock, ClusPro          | 0.16                  | 18.53     | 5.06      | *             |
|       | 124.2               | PorM <sub>C-term</sub> –nb02 complex         | Loop flexibility, global docking                 | RosettaAntibody, SnugDock, ClusPro          | 0.00                  | 27.42     | 14.15     | -             |
| 41    | 126 <sup>a</sup>    | 1,5- $\alpha$ -L-arabinohexose bound to AbnE | Oligosaccharide docking                          | GlycanDock                                  | 0.00                  | 11.24     | 4.27      | **            |
| 42    | 131                 | CEACAM1–HopQ1 complex                        | Loop flexibility, global docking                 | CCD + fragments, RosettaDock with ensembles | 0.04                  | 39.28     | 11.61     | *             |
|       | 132 <sup>a</sup>    | CEACAM1–HopQ2 complex                        | Loop flexibility, global docking                 | CCD + fragments, RosettaDock with ensembles | 0.00                  | 34.79     | 10.42     | **            |

<sup>a</sup> During the scoring round, we refined and scored models of other predictors to obtain acceptable structures.

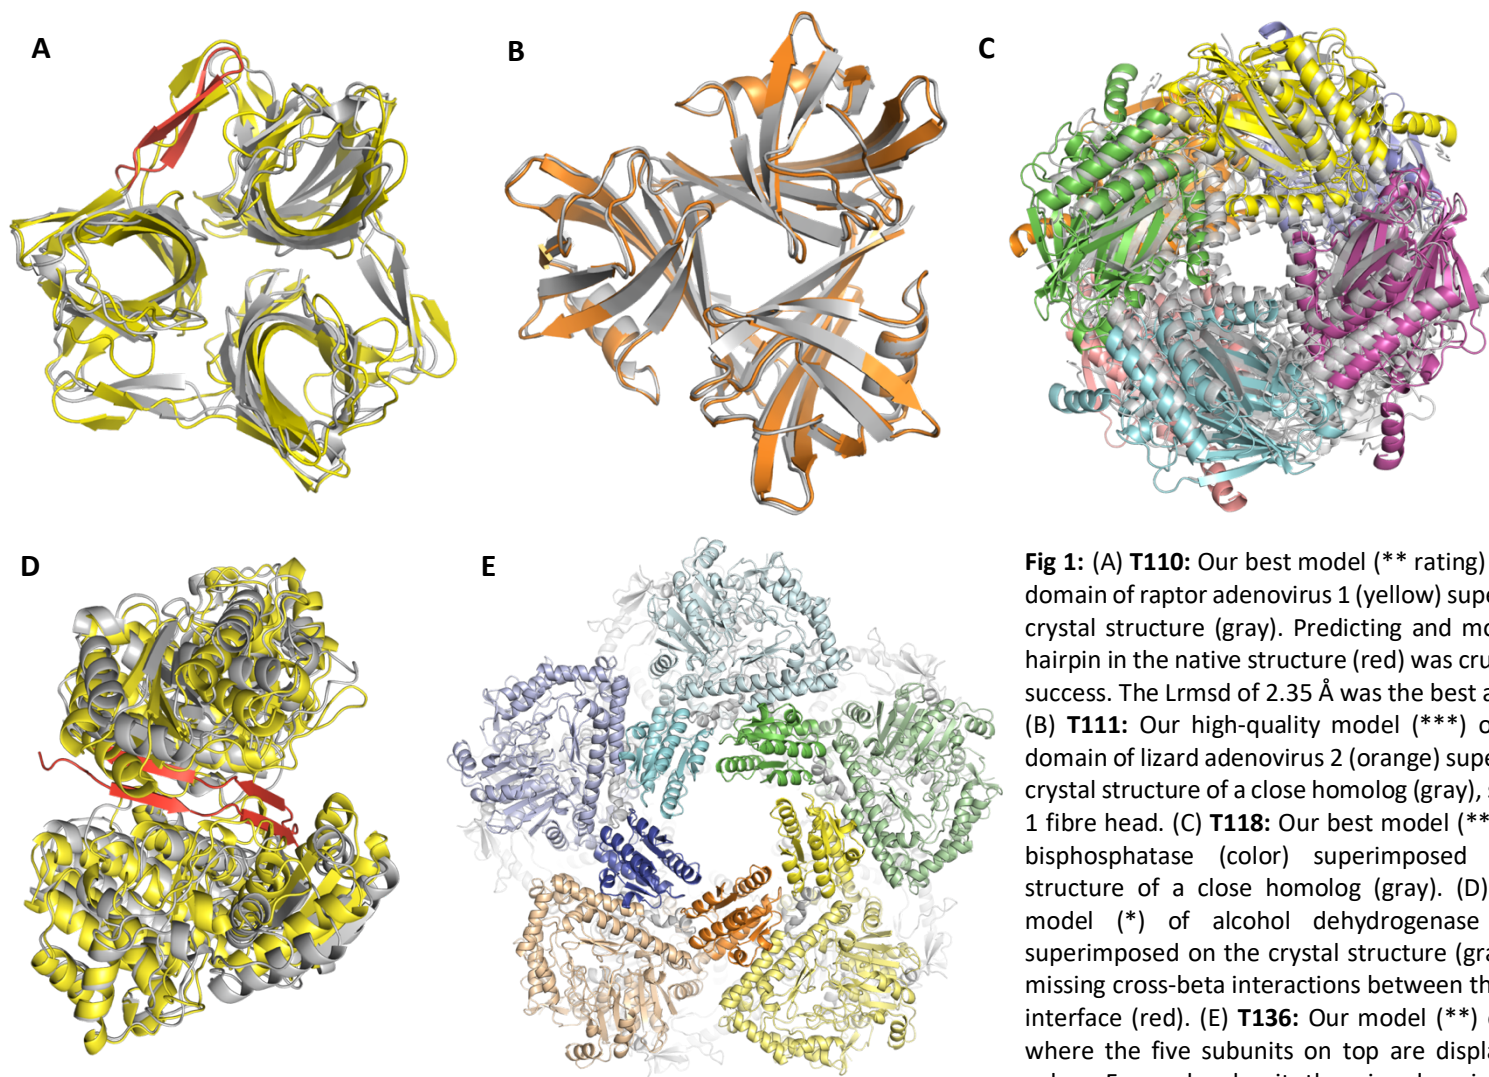

**Fig 1:** (A) **T110:** Our best model (\*\* rating) of the fibre head domain of raptor adenovirus 1 (yellow) superimposed on the crystal structure (gray). Predicting and modeling the beta-hairpin in the native structure (red) was crucial to prediction success. The Lrmsd of 2.35 Å was the best among all groups. (B) **T111:** Our high-quality model (\*\*\*) of the fibre head domain of lizard adenovirus 2 (orange) superimposed on the crystal structure of a close homolog (gray), snake adenovirus 1 fibre head. (C) **T118:** Our best model (\*\*) of fructose 1,6-bisphosphatase (color) superimposed on the crystal structure of a close homolog (gray). (D) **T119:** Our best model (\*) of alcohol dehydrogenase dimer (yellow) superimposed on the crystal structure (gray). The model is missing cross-beta interactions between the subunits at the interface (red). (E) **T136:** Our model (\*\*) of LdcA decamer where the five subunits on top are displayed in different colors. For each subunit, the wing domains are highlighted in brighter hues. The Lrmsd of 2.44 Å was the best among all groups.

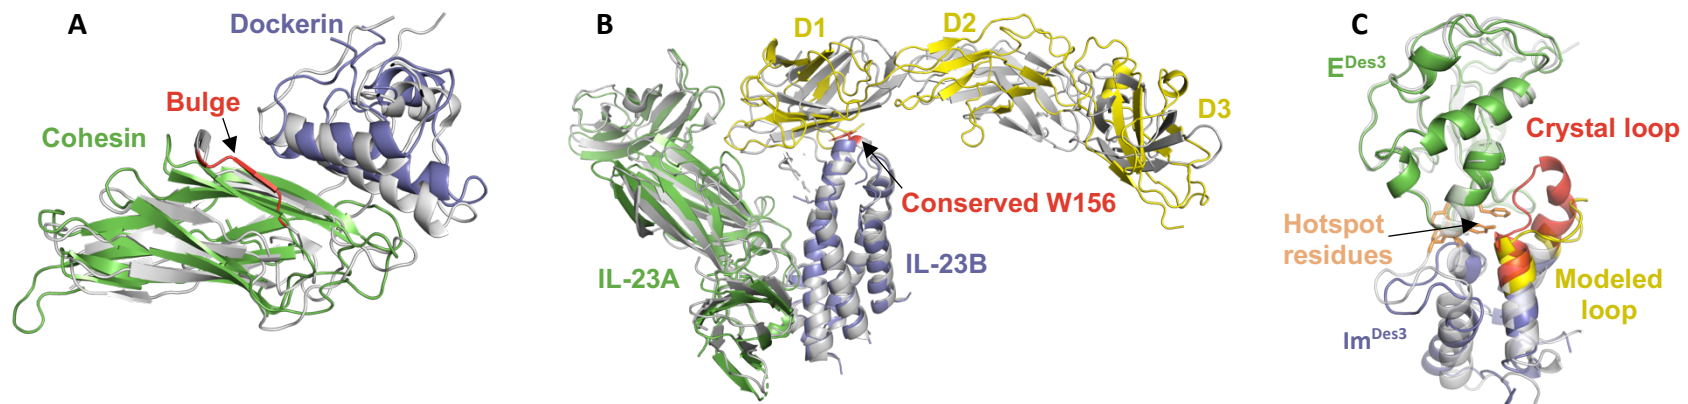

**Fig 2:** (A) **T120:** Our best model (\*) of group I dockerin (blue)–cohesin (green) complex superimposed on the crystal structure (gray). A bulge in the cohesion (red) was not modeled correctly leading to a small error in the rigid body orientation of the dockerin. (B) **T122:** Our best model (\*) of the complex of the two chains of IL-23, viz. IL-23A (green) and IL-23B (blue) with IL-23R (yellow) superimposed on the crystal structure (grey). The lightning rod interaction via the conserved Trp-156 (red) to IL-23R domain 1 (D1) was correctly predicted. IL-23R model had large errors in the relative orientation of the three domains. (C) **T133:** A 14<sup>th</sup>-ranked model (\*\*) of Im<sup>Des3</sup> (blue) bound to E<sup>Des3</sup> (green) superimposed on the crystal structure of the complex (gray). The Im<sup>Des3</sup> loop (red) is modeled inaccurately (yellow). This alters the rigid body orientation of Im<sup>Des3</sup> by pushing it ‘down’. The hotspot residues across the interface in the wild-type (orange), viz. Y54-Y55 Im2 and F86 on E2 still interact in the model of the designed complex.

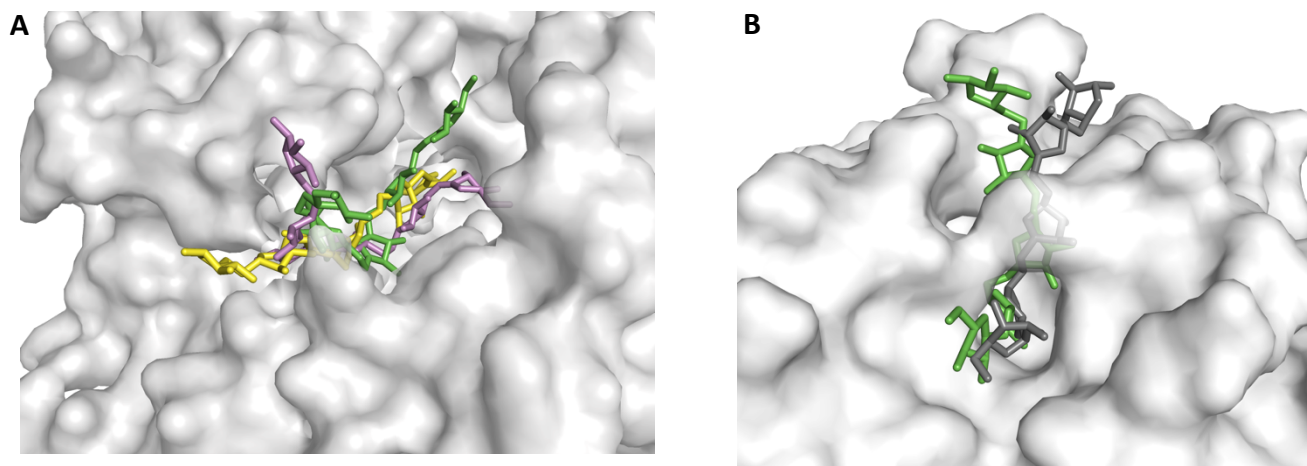

**Fig 3:** (A) **T126:** Range of ligand conformations sampled by 1,5-α-L-arabinohexose (green/yellow/pink) in the binding groove of AbnE (gray). (B) **T130:** The best predicted conformation of 1,5-α-L-arabinopentose (green) on AbnB<sub>E201A</sub> (gray), with  $f_{\text{nat}} = 63\%$ . The crystal structure (dark gray) is shown for comparison.
